# Supplementary material for: Preferentially grown nanostructured iron disulfide (FeS2) for removal of industrial pollutants
Source: Royal Society of Chemistry journal article supplement (doi:10.1039/c6ra18838a), 2016-01-01
Supplement: c6ra18838a1.pdf [file c6ra18838a1.pdf]

## Preferentially Grown Nanostructured Iron Disulfide (FeS<sub>2</sub>) for Removal of Industrial Pollutants

Gurpreet Kaur<sup>a</sup>, Bikramjeet Singh<sup>a</sup>, Paviter Singh<sup>a</sup>, Manpreet Kaur<sup>a</sup>, Kulwinder Singh<sup>a</sup>, Karmjeet Kaur Buttar<sup>b</sup>, Anup Thakur<sup>c</sup>, Rajni Bala<sup>d</sup>, Manjeet Kumar<sup>e</sup>, Akshay Kumar<sup>a\*</sup>

### Supporting Information

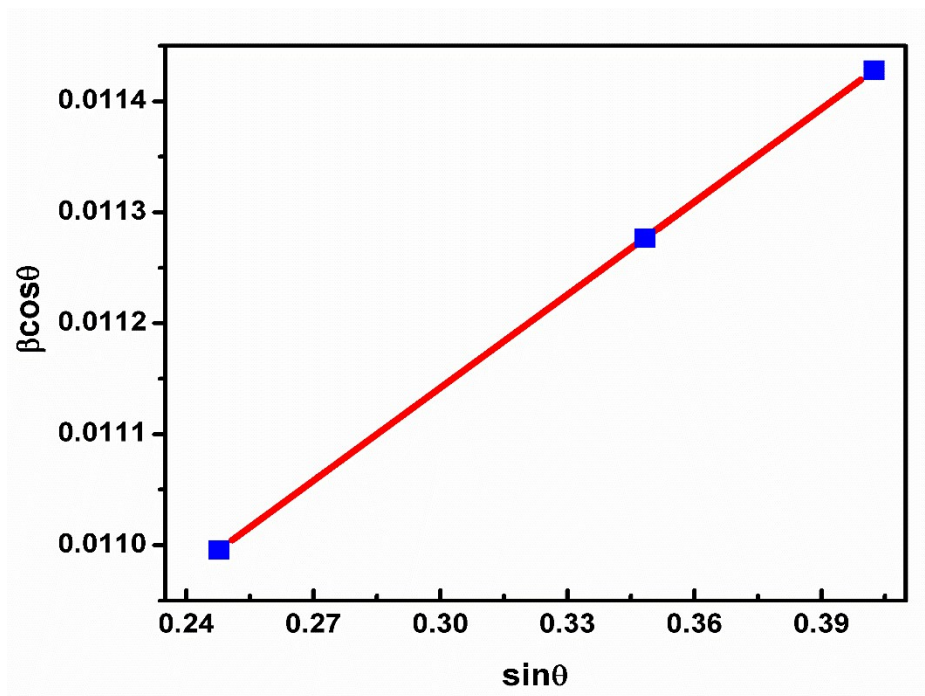

**Fig. S1.** Plot between  $\sin\theta$  versus  $\beta\cos\theta$  for calculation of particle size and strain in crystal lattice of as obtained FeS<sub>2</sub>.

| S.No. | Plane (h,k,l) | Calculated Texture coefficient | Crystallite size (nm) |
|-------|---------------|--------------------------------|-----------------------|
| 1.    | (200)         | 1.1243                         | 13                    |
| 2.    | (210)         | 0.9920                         | 13.2                  |
| 3.    | (111)         | 1.1344                         | 12.6                  |
| 4.    | (220)         | 1.0479                         | 12.1                  |
| 5.    | (211)         | 0.7012                         | 12.3                  |

**Table S1.** Calculated Texture coefficient and crystallite size for particular planes of FeS<sub>2</sub> (from XRD pattern).

| <b>Atom</b> | <b>Wyckoff Position</b> | <b>Parameter (x)</b> |
|-------------|-------------------------|----------------------|
| Fe          | (4a)                    | 0.000                |
| S           | (8c)                    | 0.38484              |

**Table S2:** Crystal structure parameters used to generate crystal structure of FeS<sub>2</sub> (figure 3).
